# Supplementary material for: Effects of long-term fertilisation on aggregates and dynamics of soil organic carbon in a semi-arid agro-ecosystem in China
Source: PeerJ. 2018 May 21;6:e4758. doi: 10.7717/peerj.4758 (PMC5967366; doi:10.7717/peerj.4758)
Supplement: Data S1 [file peerj-06-4758-s001.xlsx]

## Sheet: 1
Year	Layer	Treatments	X0.002	X0.005	X0.01	X0.02	X0.05	X0.1	X0.2	X0.25	X0.5	X1	D	Organic.carbon...
2012	0-20	BL	4.41023	6.36343	7.18703	10.3769	35.3857	27.487	6.99945	0.338352	1.0539	0.397902	2.73448	0.606
2012	0-20	BL	4.41023	6.36343	7.18703	10.3769	35.3857	27.487	6.99945	0.338352	1.0539	0.397902	2.73448	0.52
2012	0-20	BL	4.43619	6.6069	7.54338	10.8017	33.9309	26.1461	7.22925	0.46351	1.95928	0.882778	2.74051	0.606
2012	0-20	CK	4.46097	6.74099	7.73021	10.8346	34.2642	26.4045	6.83564	0.287774	1.72276	0.718268	2.73927	0.645
2012	0-20	CK	3.99176	5.82843	6.93253	10.2139	34.1793	27.3631	7.41919	0.406424	2.35736	1.30807	2.73304	0.62
2012	0-20	CK	3.94462	5.7558	6.64098	9.45362	33.2884	28.6157	8.12982	0.409784	2.35306	1.40826	2.73423	0.675
2012	0-20	M	4.03619	6.05135	6.92333	9.66664	33.1651	28.1052	8.58537	0.65039	2.08927	0.727159	2.73425	0.934
2012	0-20	M	3.68012	5.33401	6.46448	9.39111	33.3794	29.0507	8.71134	0.600687	2.34628	1.04187	2.72666	0.926
2012	0-20	M	4.28299	6.51218	7.40628	10.1262	31.6621	26.4508	9.05996	1.16432	2.50448	0.830678	2.74334	1.063
2012	0-20	MN	4.53897	6.87046	7.7718	10.7677	33.9645	26.0649	7.32644	0.528394	1.65156	0.515189	2.74102	0.892
2012	0-20	MN	3.81894	5.55466	6.58499	9.60149	33.6695	27.8773	8.09405	0.621056	2.78975	1.3883	2.73195	0.915
2012	0-20	MN	3.90998	5.73225	6.95522	10.4478	34.1389	26.8541	7.87123	0.5927	2.26251	1.23526	2.73097	0.888
2012	0-20	MNP	4.15322	6.24357	7.10108	9.84848	33.062	26.9153	8.0262	0.787303	2.73455	1.12823	2.73992	0.866
2012	0-20	MNP	4.01086	5.97869	7.08857	10.1292	34.1309	27.6209	7.83521	0.435992	1.86504	0.904674	2.73156	0.901
2012	0-20	MNP	3.84401	5.59285	6.67413	9.89926	34.0259	27.3631	8.12349	0.78656	2.58173	1.10892	2.73071	0.851
2012	0-20	MP	3.97728	5.83932	6.69791	9.55257	33.5372	27.6383	7.81999	0.475794	2.65619	1.8054	2.73703	0.867
2012	0-20	MP	3.83512	5.68612	6.70851	9.72291	33.962	27.7179	7.906	0.676195	2.68758	1.09768	2.73097	0.933
2012	0-20	MP	4.14878	6.27868	7.44315	10.7131	33.3502	26.2039	8.35924	0.96122	1.90041	0.641317	2.73531	0.996
2012	0-20	N	4.55741	6.85056	7.77211	10.8705	34.3147	26.6135	6.81144	0.119845	1.43147	0.658555	2.73993	0.583
2012	0-20	N	3.70976	5.32341	6.51686	9.81051	34.6476	28.3266	7.75138	0.414446	2.30006	1.19938	2.7254	0.627
2012	0-20	N	3.96981	5.73351	6.80537	10.1045	34.7682	27.8936	7.4249	0.364389	1.96601	0.969693	2.72971	0.671
2012	0-20	NP	4.30444	6.44729	7.53262	10.6579	34.1142	26.7234	7.01626	0.297324	1.93648	0.970053	2.73755	0.659
2012	0-20	NP	4.46939	6.78613	8.39245	12.4442	35.1992	24.9493	5.92758	0.11978	1.27568	0.43632	2.7342	0.629
2012	0-20	NP	4.11894	6.06664	7.16202	10.5817	34.4483	26.998	7.5048	0.491634	1.90025	0.727785	2.73253	0.726
2012	0-20	P	4.31715	6.44771	7.27888	10.0477	33.9841	27.9926	7.70057	0.306619	1.45103	0.473594	2.73597	0.655
2012	0-20	P	3.83438	5.58151	6.66674	9.69208	34.2798	28.9291	8.5235	0.424484	1.55163	0.516739	2.72537	0.659
2012	0-20	P	3.94839	5.68419	6.49221	9.39793	33.7034	28.4273	8.16115	0.561289	2.46904	1.15511	2.7335	0.698
1998	0-20	BL	4.19918	6.76449	7.417	11.4264	40.0169	23.8442	5.26604	0.743785	0.322005	0	2.72413	0.53
1998	0-20	CK	4.62723	7.41177	7.68319	11.4179	39.6189	23.4068	4.87484	0.64101	0.318326	0	2.73331	0.585
1998	0-20	M	3.52533	5.4401	6.09666	10.8828	42.7717	24.8432	5.0755	0.784556	0.580147	0	2.70562	0.7
1998	0-20	MN	4.19651	6.58265	6.94621	10.9435	40.6522	24.29	5.36066	0.812228	0.216106	0	2.72362	0.678
1998	0-20	MNP	4.40932	6.93046	7.03042	10.7721	39.6821	23.6611	4.35797	0.626405	2.19149	0.338684	2.73446	0.575
1998	0-20	MP	4.3393	6.93748	7.48055	11.7511	40.5505	22.8958	4.76085	0.825735	0.45871	0	2.72673	0.658
1998	0-20	N	4.49948	7.14938	7.50367	11.3881	39.5964	23.6615	5.23424	0.720319	0.246958	0	2.73067	0.596
1998	0-20	NP	4.49518	7.11745	7.57492	11.5269	40.3478	23.8872	4.73995	0.304911	0.005698	0	2.72837	0.604
1998	0-20	P	4.57733	7.3336	7.57794	11.429	39.7933	23.2743	5.03748	0.722159	0.254854	0	2.73224	0.644
1999	0-20	BL	4.16323	3.83647	6.74021	11.762	41.5994	25.3437	5.41232	0.7121	0.43053	0	2.71211	0.532
1999	0-20	CK	4.30015	6.69719	7.28324	11.0322	39.4385	24.1604	4.84881	0.575802	1.37744	0.286319	2.72966	0.556
1999	0-20	M	4.7177	7.60115	8.02383	11.8956	39.7062	22.5927	4.60628	0.594007	0.262535	0	2.73437	0.617
1999	0-20	MN	4.60097	7.14741	7.43251	11.5209	40.1266	23.1523	3.87164	0.30855	1.53237	0.306725	2.73477	0.586
1999	0-20	MNP	4.27744	6.6076	7.4467	11.4618	40.7965	24.4621	4.4805	0.365807	0.101538	0	2.72297	0.545
1999	0-20	MP	4.46467	6.9253	7.2698	11.0989	39.3514	23.5249	4.22217	0.515828	2.17674	0.450344	2.73537	0.581
1999	0-20	N	4.62874	7.1923	7.85763	12.0545	40.61	23.0907	3.95164	0.33788	0.276611	0	2.73038	0.593
1999	0-20	NP	4.17717	6.34134	7.28186	11.2363	40.1486	24.4122	4.94128	0.690227	0.764818	0.00613	2.72337	0.553
1999	0-20	P	4.16371	6.51421	7.41532	11.4029	39.7707	24.0561	5.31475	0.795615	0.566653	0	2.72359	0.623
2000	0-20	BL	4.06341	6.21696	6.66084	11.0342	41.1151	24.7272	5.08002	0.675236	0.427084	0	2.71976	0.581
2000	0-20	CK	4.1241	6.28471	6.7355	11.1332	41.5313	24.7098	4.80959	0.457396	0.214405	0	2.71976	0.58
2000	0-20	M	4.36092	7.32943	8.09929	12.3358	39.3141	21.989	4.95972	0.921802	0.689918	0	2.72913	0.747
2000	0-20	MN	4.29529	7.04766	7.36704	11.1011	38.5764	23.2878	4.84342	0.683925	2.12589	0.671494	2.7345	0.801
2000	0-20	MNP	4.23081	5.93958	7.14115	11.3635	39.6992	23.7426	5.24959	0.936839	1.48204	0.214731	2.72642	0.761
2000	0-20	MP	4.42322	6.33231	7.06001	11.6746	40.9538	23.7061	4.54128	0.63787	0.670845	0	2.72644	0.803
2000	0-20	N	4.5759	6.5889	7.45084	11.617	38.9018	23.0263	4.11085	0.584149	2.54924	0.595102	2.73758	0.619
2000	0-20	NP	4.20797	6.18168	6.90693	10.995	39.7667	24.3935	4.60123	0.468605	2.02623	0.45214	2.7282	0.654
2000	0-20	P	4.52943	7.47869	7.85432	11.6905	39.4152	23.0724	4.72815	0.636704	0.594616	0	2.73223	0.595
2001	0-20	BL	3.78551	6.04224	6.6333	10.8859	40.8066	24.6833	4.52783	0.403935	1.79673	0.434646	2.71815	0.574
2001	0-20	CK	4.09589	6.39013	6.73628	10.5974	40.3334	24.7394	5.36282	0.855462	0.889195	0	2.72342	0.619
2001	0-20	M	4.0546	6.64386	7.14294	10.9428	39.9506	24.265	5.48428	0.905723	0.610226	0	2.72269	0.819
2001	0-20	MN	4.12498	6.56458	7.07501	11.0626	39.3242	23.8531	5.1071	0.767917	1.68966	0.430828	2.72788	0.778
2001	0-20	MNP	4.20958	6.94801	7.45566	11.4067	39.9045	23.7836	5.02645	0.594869	0.651637	0.018983	2.72544	0.652
2001	0-20	MP	4.27731	6.83678	7.063	10.7522	38.8771	23.6832	5.06915	0.742797	2.21251	0.485886	2.73357	0.784
2001	0-20	N	3.99674	6.43022	7.17409	11.4654	39.6063	23.2152	4.24159	0.556004	2.33026	0.984253	2.72716	0.661
2001	0-20	NP	3.68166	5.97199	6.38836	10.1395	40.7409	25.7542	6.01319	0.862605	0.447584	0	2.71329	0.732
2001	0-20	P	4.14232	6.7353	7.2476	11.0144	38.3852	23.6199	4.9487	0.683254	2.48074	0.742587	2.73221	0.663
2002	0-20	BL	4.08774	6.2957	6.53101	9.92805	40.4224	25.9347	5.61845	0.687238	0.494642	0	2.72254	0.517
2002	0-20	CK	3.83898	6.15626	6.42202	9.94451	39.74	25.061	4.91527	0.627526	2.5524	0.742114	2.72491	0.628
2002	0-20	M	4.48817	7.15583	7.35282	11.1595	39.2719	23.2873	5.83209	1.14627	0.306047	0	2.73213	0.908
2002	0-20	MN	4.51042	7.24126	7.47568	11.456	38.0669	22.4411	4.8323	0.787988	2.46833	0.720017	2.74001	0.759
2002	0-20	MNP	3.79935	6.16799	6.91765	11.2077	39.929	23.7606	4.22067	0.375791	2.33933	1.28187	2.72328	0.629
2002	0-20	MP	4.24477	6.88983	7.17286	10.9819	39.9479	23.8629	5.54756	0.982678	0.369583	0	2.72654	0.649
2002	0-20	N	3.81235	6.14997	6.7614	11.0007	39.6556	23.8722	4.87679	0.741766	2.5031	0.626118	2.72289	0.609
2002	0-20	NP	3.57067	5.76668	6.65419	10.9014	38.9441	24.396	6.52675	1.36372	1.79398	0.082498	2.71528	0.765
2002	0-20	P	3.76048	6.13724	6.99767	11.1123	39.4493	24.529	6.283	1.06604	0.664892	0	2.71626	0.719
2003	0-20	BL	4.23634	6.92325	7.4036	11.2146	39.3382	23.7677	4.51384	0.418647	1.7029	0.480908	2.73008	0.582
2003	0-20	CK	4.22801	6.95715	7.403	11.0761	39.577	23.9595	5.29293	0.838034	0.668255	0	2.72685	0.603
2003	0-20	M	4.21411	6.84669	7.245	10.8662	38.9494	24.1627	5.76675	1.08054	0.868655	0	2.72807	0.806
2003	0-20	MN	4.268	7.1625	7.56565	11.0787	38.4749	23.7441	5.84964	1.00087	0.855611	0	2.72987	0.876
2003	0-20	MNP	4.58774	7.65281	7.88528	11.6441	39.1401	22.9065	4.88067	0.62033	0.664817	0.017668	2.73419	0.797
2003	0-20	MP	4.29243	7.13133	7.52899	11.2648	37.9406	22.2493	4.7048	0.807158	2.66572	1.41481	2.73912	0.833
2003	0-20	N	4.13349	6.72168	7.25516	11.2168	39.6798	23.8889	4.67195	0.571691	1.51249	0.348013	2.72677	0.572
2003	0-20	NP	3.70026	5.85707	6.40244	10.41	39.6516	24.5492	5.02359	0.837374	2.87661	0.691817	2.72165	0.625
2003	0-20	P	4.73223	7.74442	7.93688	11.669	39.5486	23.132	4.54475	0.483512	0.208502	0	2.73495	0.579
2004	0-20	BL	3.76169	5.9614	6.63206	10.8295	39.9465	24.8655	5.10145	0.58583	1.99188	0.324133	2.7187	0.531
2004	0-20	CK	4.48751	7.08129	7.45923	11.3222	39.2652	23.5897	4.62935	0.491492	1.39841	0.275647	2.73364	0.605
2004	0-20	M	3.93734	6.35423	7.10269	11.4338	39.3839	23.9072	5.42159	0.705979	1.47285	0.280485	2.72219	0.722
2004	0-20	MN	4.52512	7.22386	7.78062	11.8354	39.0258	23.0665	5.16431	0.750175	0.628196	0	2.73212	0.826
2004	0-20	MNP	4.18404	6.83084	7.45885	11.6641	39.8061	23.1865	4.673	0.595814	1.31531	0.28556	2.72683	0.729
2004	0-20	MP	4.44326	7.0689	7.43421	11.5384	39.6122	23.0204	4.51288	0.597293	1.48249	0.289975	2.73279	0.798
2004	0-20	N	4.29576	7.11278	7.74555	11.9251	39.8974	22.8066	4.60762	0.721711	0.887474	0	2.7274	0.664
2004	0-20	NP	4.39997	7.11119	7.50483	11.6135	39.82	23.1221	4.79468	0.748193	0.864814	0.020674	2.72984	0.625
2004	0-20	P	4.59591	7.39836	7.71367	11.4448	37.996	22.646	4.46006	0.551331	2.36745	0.82637	2.7414	0.608
2005	0-20	BL	4.30818	6.81689	7.2177	11.3311	39.2834	23.6152	4.50371	0.443256	1.92396	0.556588	2.73192	0.51
2005	0-20	CK	4.3689	6.73277	7.10276	11.2552	39.9836	23.9771	5.16393	0.695508	0.720243	0	2.72824	0.605
2005	0-20	M	3.90589	6.09276	6.71379	10.4823	38.3113	24.7412	5.73256	0.785333	2.41831	0.816531	2.72709	0.772
2005	0-20	MN	3.98258	6.33371	6.9247	10.8187	37.6272	23.3831	5.67356	1.10365	3.13565	1.01714	2.73251	0.795
2005	0-20	MNP	4.23361	6.97454	7.20296	10.6226	38.229	23.6955	4.74416	0.701229	2.8227	0.773668	2.73598	0.829
2005	0-20	MP	3.97759	6.83575	7.36972	10.4899	36.6972	24.1156	6.27576	0.984569	2.60737	0.646607	2.73223	0.795
2005	0-20	N	4.21135	6.76785	7.2213	11.0079	39.5471	24.2188	5.2787	0.770162	0.951307	0.025565	2.72679	0.644
2005	0-20	NP	4.26428	7.04247	7.596	11.5566	38.6453	22.85	4.57967	0.534542	2.10744	0.823669	2.7335	0.592
2005	0-20	P	4.5561	6.67664	6.63153	10.8965	40.6986	24.1013	3.94077	0.301549	1.82708	0.369987	2.73409	0.619
2006	0-20	BL	3.77928	6.09527	6.77941	10.7727	38.6361	24.3542	5.47016	0.789917	2.46406	0.858902	2.72411	0.571
2006	0-20	CK	3.53064	5.80052	6.79432	11.074	39.0416	23.6571	5.02474	0.739082	2.70346	1.63456	2.72033	0.654
2006	0-20	M	3.55054	5.44155	5.90971	9.40385	39.0243	25.8971	5.87886	0.90226	2.85961	1.13225	2.72072	0.877
2006	0-20	MN	3.77573	6.2473	6.99152	10.8106	38.2954	24.1558	5.69653	0.783415	2.2873	0.956467	2.72473	0.861
2006	0-20	MNP	3.65873	6.05065	6.78589	10.6402	37.9152	23.9041	5.66178	0.819752	2.96835	1.59526	2.72624	0.805
2006	0-20	MP	3.5701	5.81332	6.56483	10.7605	38.7169	23.9397	5.72666	1.03548	2.8985	0.97411	2.7208	0.844
2006	0-20	N	3.53909	5.64915	6.66287	11.1934	40.5173	24.3546	4.91748	0.580223	1.84351	0.742345	2.71313	0.63
2006	0-20	NP	3.55134	5.5595	6.58972	11.4788	41.3052	24.2529	4.67021	0.492829	1.68595	0.413521	2.71042	0.657
2006	0-20	P	3.83637	6.34032	7.10407	11.3054	38.8599	23.6301	4.94902	0.683746	2.39675	0.894344	2.7248	0.673
2007	0-20	BL	4.44955	6.97243	7.15426	10.7221	38.0803	23.7513	5.19704	0.668356	2.2212	0.783402	2.73863	0.561
2007	0-20	CK	4.94889	7.51584	7.5405	11.2642	38.698	22.6995	5.13545	1.05164	1.14599	0	2.74242	0.601
2007	0-20	M	4.61024	7.15826	7.43415	11.2619	39.0902	23.5457	5.42454	0.893189	0.581727	0	2.73425	0.784
2007	0-20	MN	4.62246	7.28846	7.59257	11.3156	38.4289	23.459	5.68766	0.917145	0.688227	0	2.73559	0.759
2007	0-20	MNP	4.22614	6.84967	7.192	10.8729	38.843	23.6989	5.29788	0.739049	1.66837	0.612077	2.73178	0.756
2007	0-20	MP	4.03504	6.55216	6.92691	10.5474	38.688	24.0666	5.41537	0.829163	2.20768	0.73169	2.72977	0.809
2007	0-20	N	4.86254	7.74701	7.92645	11.743	39.407	22.7688	4.57058	0.565117	0.409477	0	2.73773	0.573
2007	0-20	NP	4.98888	7.59989	7.62919	11.3966	39.4791	23.1557	4.7531	0.611708	0.385875	0	2.73984	0.607
2007	0-20	P	5.07015	7.81788	7.76223	11.3505	38.7315	23.2731	5.00191	0.533187	0.459591	0	2.74231	0.596
2008	0-20	BL	4.02542	6.43238	7.04321	10.884	38.4135	24.0512	5.53575	0.781699	2.26704	0.565904	2.72856	0.539
2008	0-20	CK	4.45957	7.00265	7.57969	11.6531	38.9127	22.6772	4.44018	0.616774	2.19312	0.465041	2.73557	0.602
2008	0-20	M	3.60045	5.75227	6.51657	10.2189	38.0396	25.1813	6.21291	0.908399	2.74308	0.826574	2.72141	0.739
2008	0-20	MN	4.23857	6.66981	6.92093	10.3807	37.1834	23.6877	5.52094	0.99712	3.25937	1.14136	2.73964	0.794
2008	0-20	MNP	4.61576	7.31433	7.45796	11.2726	38.651	22.5701	4.87834	0.906952	1.97446	0.358455	2.73947	0.758
2008	0-20	MP	4.70755	7.43382	7.53893	11.2038	37.3118	21.8171	5.02483	1.05965	3.04919	0.853334	2.74709	0.877
2008	0-20	N	4.36366	7.06902	7.62606	11.7032	40.1268	23.2633	4.61637	0.577691	0.653788	0	2.7278	0.609
2008	0-20	NP	4.4739	7.1155	7.43994	11.3237	39.807	23.5296	5.05959	0.727216	0.523576	0	2.73066	0.587
2008	0-20	P	4.40386	7.07759	7.51651	11.3549	38.8293	23.5248	4.62085	0.431805	1.77288	0.467416	2.73392	0.65
2009	0-20	BL	4.22046	6.48979	6.90345	10.6855	38.5243	24.222	5.01366	0.502625	2.15054	1.28762	2.73419	0.521
2009	0-20	CK	3.77019	6.0164	6.71795	10.7019	39.3811	24.6575	5.10317	0.486095	2.12846	1.03725	2.72235	0.58
2009	0-20	M	3.47269	5.51729	6.44502	10.3125	37.9407	24.8884	6.24994	0.98783	2.75779	1.4278	2.72014	0.848
2009	0-20	MN	3.76139	5.99134	6.65976	10.4251	38.0449	24.5657	6.06305	1.0323	2.77612	0.680325	2.72506	0.867
2009	0-20	MNP	3.71079	5.90925	6.63322	10.7687	38.8606	24.0652	5.79415	0.923558	2.57901	0.755444	2.72229	0.78
2009	0-20	MP	3.47609	5.58515	6.481	10.3823	37.6718	24.6344	6.85063	1.24786	2.8707	0.800076	2.71934	0.816
2009	0-20	N	3.9068	6.26963	7.11116	11.4156	40.1939	24.0448	4.51722	0.446384	1.7872	0.307289	2.72071	0.596
2009	0-20	NP	3.91217	6.19627	6.86022	10.8097	38.7447	23.8491	5.03871	0.708308	2.47852	1.40228	2.72868	0.603
2009	0-20	P	3.84353	6.16006	6.88028	10.7569	38.4807	24.5269	5.69717	0.776456	2.20554	0.672406	2.72452	0.606
2010	0-20	BL	4.78473	7.47804	7.52457	11.1818	38.2693	22.9984	4.32007	0.532726	2.2665	0.643915	2.74383	0.512
2010	0-20	CK	4.32225	6.80037	7.12896	11.0096	39.1029	23.7085	4.73151	0.589853	2.15855	0.447511	2.73313	0.587
2010	0-20	M	4.29636	6.97369	7.44544	11.2396	38.4794	23.5152	4.78777	0.605765	2.13568	0.521125	2.73352	0.734
2010	0-20	MN	4.27618	6.72312	7.13114	10.9121	37.9388	23.6336	5.23051	0.788006	2.70171	0.664867	2.7357	0.84
2010	0-20	MNP	4.01816	6.3539	6.8917	10.8111	38.7878	23.9203	5.43001	0.775952	2.20181	0.809269	2.72871	0.846
2010	0-20	MP	3.67093	6.07561	6.95613	11.0144	37.8248	23.4132	5.79685	1.05842	3.17017	1.01946	2.72507	0.897
2010	0-20	N	3.92752	6.3171	6.9533	10.936	39.5071	24.1916	4.80779	0.472264	2.08462	0.802597	2.725	0.573
2010	0-20	NP	3.66619	5.86966	6.69906	10.8918	40.1165	24.6082	5.47281	0.787565	1.5182	0.369926	2.71573	0.593
2010	0-20	P	4.49202	7.03386	7.52794	11.4723	38.9185	23.276	4.36882	0.456162	1.99096	0.463301	2.73558	0.593
2011	0-20	BL	4.38174	6.90191	7.12366	10.7648	38.9169	23.9126	4.65687	0.576612	2.16623	0.598699	2.73535	0.512
2011	0-20	CK	4.57131	7.45026	7.63447	11.2403	38.4527	22.9778	4.41277	0.607803	2.22446	0.428187	2.73928	0.612
2011	0-20	M	3.98296	6.60356	7.06956	10.5293	37.5693	24.2487	5.33332	0.812646	3.04029	0.810406	2.73192	0.825
2011	0-20	MN	4.24836	6.78499	7.19069	10.671	37.9217	24.046	5.34746	0.790775	2.39137	0.607691	2.73468	0.886
2011	0-20	MNP	4.31	6.99912	7.28279	11.235	39.5257	23.4811	4.48416	0.482975	1.71341	0.485753	2.73168	0.812
2011	0-20	MP	4.66948	7.43157	7.51578	11.3581	39.5142	23.2389	4.80822	0.648091	0.799969	0.015722	2.73544	0.905
2011	0-20	N	4.70644	7.58393	7.66573	11.2257	38.3214	22.6748	4.17099	0.575106	2.37787	0.698087	2.74316	0.601
2011	0-20	NP	4.80377	7.49974	7.55157	11.2116	38.1265	22.8446	4.56323	0.592442	2.24095	0.565568	2.74415	0.638
2011	0-20	P	4.13964	6.78993	7.22475	10.7717	37.8472	23.7197	5.0933	0.743142	2.64932	1.0212	2.73455	0.663

## Sheet: 2
Year	Layer	Treatments	X0.002	X0.005	X0.01	X0.02	X0.05	X0.1	X0.2	X0.25	X0.5	X1	D	Organic.carbon...
2012	0-20	BL	4.41023	6.36343	7.18703	10.3769	35.3857	27.487	6.99945	0.338352	1.0539	0.397902	2.73448	0.606
2012	0-20	BL	4.41023	6.36343	7.18703	10.3769	35.3857	27.487	6.99945	0.338352	1.0539	0.397902	2.73448	0.52
2012	0-20	BL	4.43619	6.6069	7.54338	10.8017	33.9309	26.1461	7.22925	0.46351	1.95928	0.882778	2.74051	0.606
2012	0-20	CK	4.46097	6.74099	7.73021	10.8346	34.2642	26.4045	6.83564	0.287774	1.72276	0.718268	2.73927	0.645
2012	0-20	CK	3.99176	5.82843	6.93253	10.2139	34.1793	27.3631	7.41919	0.406424	2.35736	1.30807	2.73304	0.62
2012	0-20	CK	3.94462	5.7558	6.64098	9.45362	33.2884	28.6157	8.12982	0.409784	2.35306	1.40826	2.73423	0.675
2012	0-20	M	4.03619	6.05135	6.92333	9.66664	33.1651	28.1052	8.58537	0.65039	2.08927	0.727159	2.73425	0.934
2012	0-20	M	3.68012	5.33401	6.46448	9.39111	33.3794	29.0507	8.71134	0.600687	2.34628	1.04187	2.72666	0.926
2012	0-20	M	4.28299	6.51218	7.40628	10.1262	31.6621	26.4508	9.05996	1.16432	2.50448	0.830678	2.74334	1.063
2012	0-20	MN	4.53897	6.87046	7.7718	10.7677	33.9645	26.0649	7.32644	0.528394	1.65156	0.515189	2.74102	0.892
2012	0-20	MN	3.81894	5.55466	6.58499	9.60149	33.6695	27.8773	8.09405	0.621056	2.78975	1.3883	2.73195	0.915
2012	0-20	MN	3.90998	5.73225	6.95522	10.4478	34.1389	26.8541	7.87123	0.5927	2.26251	1.23526	2.73097	0.888
2012	0-20	MNP	4.15322	6.24357	7.10108	9.84848	33.062	26.9153	8.0262	0.787303	2.73455	1.12823	2.73992	0.866
2012	0-20	MNP	4.01086	5.97869	7.08857	10.1292	34.1309	27.6209	7.83521	0.435992	1.86504	0.904674	2.73156	0.901
2012	0-20	MNP	3.84401	5.59285	6.67413	9.89926	34.0259	27.3631	8.12349	0.78656	2.58173	1.10892	2.73071	0.851
2012	0-20	MP	3.97728	5.83932	6.69791	9.55257	33.5372	27.6383	7.81999	0.475794	2.65619	1.8054	2.73703	0.867
2012	0-20	MP	3.83512	5.68612	6.70851	9.72291	33.962	27.7179	7.906	0.676195	2.68758	1.09768	2.73097	0.933
2012	0-20	MP	4.14878	6.27868	7.44315	10.7131	33.3502	26.2039	8.35924	0.96122	1.90041	0.641317	2.73531	0.996
2012	0-20	N	4.55741	6.85056	7.77211	10.8705	34.3147	26.6135	6.81144	0.119845	1.43147	0.658555	2.73993	0.583
2012	0-20	N	3.70976	5.32341	6.51686	9.81051	34.6476	28.3266	7.75138	0.414446	2.30006	1.19938	2.7254	0.627
2012	0-20	N	3.96981	5.73351	6.80537	10.1045	34.7682	27.8936	7.4249	0.364389	1.96601	0.969693	2.72971	0.671
2012	0-20	NP	4.30444	6.44729	7.53262	10.6579	34.1142	26.7234	7.01626	0.297324	1.93648	0.970053	2.73755	0.659
2012	0-20	NP	4.46939	6.78613	8.39245	12.4442	35.1992	24.9493	5.92758	0.11978	1.27568	0.43632	2.7342	0.629
2012	0-20	NP	4.11894	6.06664	7.16202	10.5817	34.4483	26.998	7.5048	0.491634	1.90025	0.727785	2.73253	0.726
2012	0-20	P	4.31715	6.44771	7.27888	10.0477	33.9841	27.9926	7.70057	0.306619	1.45103	0.473594	2.73597	0.655
2012	0-20	P	3.83438	5.58151	6.66674	9.69208	34.2798	28.9291	8.5235	0.424484	1.55163	0.516739	2.72537	0.659
2012	0-20	P	3.94839	5.68419	6.49221	9.39793	33.7034	28.4273	8.16115	0.561289	2.46904	1.15511	2.7335	0.698
